# Supplementary material for: Study of the Soil Seed Bank Composition in Arjo-Diga Humid Afromontane Forest under Different Land Use Types and Its Implications for the Restoration of Degraded Lands in Western Ethiopia
Source: Hindawi journal article supplement (doi:10.1155/2024/5119487), 2024-02-06
Supplement: f1 [file 5119487.f1.docx]

| Supplementary appendix 1: List of identified soil seed bank species in Diga district: Habit (H): T=Tree, H=Herb, Shrub=S, Land use types(LUT): Forest land=FL, Shrubland= SL, Bare land=BL, Grassland=GL, Soil layer (SL) 1= 0-3cm, 2= 3-6 cm and 3= 6-9 cm, Abundance=Ab, Frequency=F, Percentage frequency = %F and Relative frequency=RF, | | | | | | | | | |
| --- | --- | --- | --- | --- | --- | --- | --- | --- | --- |
| Scientific name | Family | H | LUT | SL | Ab | Density (seeds/m2) | F | %F | RF |
| *Achyranthes aspera* L. | Amaranthaceae | H | SL | 1 | 2 | 2.5 | 2 | 5.6 | 65.36 |
| *Acmella caulirhiza* Del. | Asteraceae | H | FL | 1,2 | 12 | 14.8 | 2 | 5.6 | 65.36 |
| *Adenostemma mauritianum* DC | Asteraceae | H | GL | 1 | 2 | 2.5 | 1 | 2.8 | 32.68 |
| *Ageratum conyzoides* L. | Asteraceae | H | FL,SL,GL,BL | 1,2 | 213 | 263.0 | 22 | 61.1 | 718.95 |
| *Anagallis arvensis* L. | Primulaceae | H | FL,SL,GL,BL | 1,2,3 | 17 | 21.0 | 4 | 11.1 | 130.72 |
| *Calpurnia aurea* (Ait.) Benth. | Fabaceae | S | BL | 2 | 2 | 2.5 | 2 | 5.6 | 65.36 |
| *Cardamine trichocarpa* A. Rich | Brassicaceae | H | GL,BL,SL,FL | 1,2 | 112 | 138.3 | 19 | 52.8 | 620.92 |
| *Centella asiatica* (L.) Urban | Apiaceae | H | GL,BL,SL,FL | 1,2,3 | 337 | 416.0 | 32 | 88.9 | 1045.75 |
| *Commelina bengahalensis* L. | Commolinaceae | H | GL,BL,SL | 1,2,3 | 6 | 7.4 | 4 | 11.1 | 130.72 |
| *Croton macrostachyus* Hochst. Ex Delile | Euphorbiaceae | T | FL,BL | 2 | 7 | 8.6 | 2 | 5.6 | 65.36 |
| *Cynoglossum lanceolatum* Forssk | Boraginaceeae | H | FL,BL | 1,2 | 6 | 7.4 | 3 | 8.3 | 98.04 |
| *Cyperus brevifolius* (Rottb.) Hasskn | Cyperaceae | H | FL,GL,SL,BL | 1,2,3 | 147 | 181.5 | 15 | 41.7 | 490.20 |
| *Cyperus esculentus* L. | Cyperaceae | H | SL,BL | 1,2,3 | 46 | 56.8 | 8 | 22.2 | 261.44 |
| *Cyperus fischerianus* A.Rich | Cyperaceae | H | GL,BL,SL,FL | 1,2,3 | 186 | 229.6 | 25 | 69.4 | 816.99 |
| *Cyperus niveus Retz* | Cyperaceae | H | SL | 1,3 | 10 | 12.3 | 1 | 2.8 | 32.68 |
| *Dichrocephala integrifolia  (*L.f.) Kuntze | Asteraceae | H | FL,GL | 1,2 | 4 | 4.9 | 2 | 5.6 | 65.36 |
| *Digitaria abyssinica* (Hochst. ex A. Rich.) Stapf | Poaceae | H | FL,GL,SL,BL | 1,2 | 29 | 35.8 | 5 | 13.9 | 163.40 |
| *Digitaria ternata* (A. Rich.) Stapf | Poaceae | H | SL,BL | 1,2,3 | 4 | 4.9 | 4 | 11.1 | 130.72 |
| *Eleusine indica* (L.) Gaertn | Poaceae | H | FL,GL,SL,BL | 1,2 | 111 | 137.0 | 15 | 41.7 | 490.20 |
| *Entada abyssinica* Steud. Ex A. Rich | Fabaceae | T | SL,FL | 1,2,3 | 5 | 6.2 | 3 | 8.3 | 98.04 |
| *Eragrostis paniciformis* (A.Br)Steud | Poaceae | H | GL,SL,BL | 1 | 15 | 18.5 | 3 | 8.3 | 98.04 |
| *Eragrostsis schweinfurthii* Chiov | Poaceae | H | BL | 1 | 10 | 12.3 | 1 | 2.8 | 32.68 |
| *Euphorbia rothiana* Spreng. | Euphorbiaceae | H | SL,FL | 1 | 7 | 8.6 | 2 | 5.6 | 65.36 |
| *Ficus sur* Forssk | Moraceae | T | FL,GL | 1,3 | 4 | 4.9 | 3 | 8.3 | 98.04 |
| *Galinsoga parviflora* Cav | Asteraceae | H | FL,GL,SL,BL | 1,2,3 | 103 | 127.2 | 7 | 19.4 | 228.76 |
| *Guizotia scabra* (Vis.) Chiov | Asteraceae | H | GL,SL, | 1,2 | 35 | 43.2 | 8 | 22.2 | 261.44 |
| *Hygrophila schulli*  *(* Hamilt)M.R&S..Hlmeida | Acanthaceae | H | BL | 3 | 2 | 2.5 | 1 | 2.8 | 32.68 |
| *Hypoestes triflora* (Forssk.) Roem.  & Schult. | Acanthaceae | H | SL | 2,3 | 4 | 4.9 | 1 | 2.8 | 32.68 |
| *Ipomoea eriocarpa* R. Br. | Convolvulaceae | H | FL | 3 | 5 | 6.2 | 1 | 2.8 | 32.68 |
| *Kalanchoe petitiana* A. Rich | Crassulaceae | H | FL,GL | 1,2,3 | 16 | 19.8 | 3 | 8.3 | 98.04 |
| *Laggera crispata* (Vahl) Hepper & Wood | Asteraceae | H | FL,GL,SL | 1,2,3 | 15 | 18.5 | 6 | 16.7 | 196.08 |
| *Leucas martinicensis* (Jacq.) R. Br | Lamiaceae | H | GL | 1 ,3 | 10 | 12.3 | 4 | 11.1 | 130.72 |
| *Mitracarpus hirtus* (L.) DC | Rubiaceae | H | FL | 1,3 | 12 | 14.8 | 3 | 8.3 | 98.04 |
| *Nicandra physaloides* (L.) Gaerin. | Solonaceae | H | SL | 1,2,3 | 16 | 19.8 | 3 | 8.3 | 98.04 |
| *Oldenlandia herbacea* (L.) Roxb. | Rubiaceae | H | GL | 1,2,3 | 10 | 12.3 | 2 | 5.6 | 65.36 |
| *Oplismenus* *hirtellus* (L.) P. Beauv | Poaceae | H | FL,GL,SL,BL | 1,2,3 | 144 | 177.8 | 22 | 61.1 | 718.95 |
| *Persicaria.nepalensis* (Meisn.) H.Gross | Polygonaceae | H | SL | 1,3 | 3 | 3.7 | 2 | 5.6 | 65.36 |
| *Phyllanthus ovalifoliu*s Forssk | Euphorbiaceae | H | FL | 1,2,3 | 13 | 16.0 | 3 | 8.3 | 98.04 |
| *Pilea tetraphylla* (Steudel) Blume | Urticaceae | H | SL | 1,3 | 5 | 6.2 | 1 | 2.8 | 32.68 |
| *Plantago lanceoleta* L*.* | Plantaginaceae | H | GL | 1,2 | 2 | 2.5 | 2 | 5.6 | 65.36 |
| *Psilotrichum elliotii* Baker | Amaranthaceae | H | FL | 1 | 5 | 6.2 | 1 | 2.8 | 32.68 |
| *Pterolobium stellatum* (Forssk.) Brenan | Fabaceae | H | FL | 1,2 | 3 | 3.7 | 3 | 8.3 | 98.04 |
| *Stellaria manoii* Hook.f | Caryopyllaceae | H | BL | 2 | 1 | 1.2 | 1 | 2.8 | 32.68 |
| *Tagetes minuta* L*.* | Asteraceae | H | GL,FL | 1,3 | 11 | 13.6 | 3 | 8.3 | 98.04 |
| *Trifolium baccarini* Chiov | Fabaceeae | H | SL,GL | 1,2,3 | 28 | 34.6 | 4 | 11.1 | 130.72 |
| *Trifolium rueppellianum* Fresen | Fabaceae | H | SL,BL,FL | 1,2 | 91 | 112.3 | 10 | 27.8 | 326.80 |
| *Triumfeta brachyceras* K. Schum. | Tiliaceae | H | SL | 1,2,3 | 6 | 7.4 | 1 | 2.8 | 32.68 |
| *Triumfetta rhombodea* Jacq | Tiliaceae | H | BL | 1 | 5 | 6.2 | 1 | 2.8 | 32.68 |
| *Uebelinia abyssinica* Hochst | Caryopyllaceae | H | SL | 1 | 5 | 6.2 | 1 | 2.8 | 32.68 |
| *Vernonia auriculifera* Hiern | Asteraceae | S | FL | 1,3 | 1 |  | 2 | 5.6 | 65.36 |
| *Veronica javanica* Blume. | Scrophulariaceae | H | SL,GL,FL, | 1,2 | 701 | 865.4 | 30 | 83.3 | 980.39 |

| Supplementary appendix 2: Percentage frequency of soil seed bank species and their density across soil layers | | | | |
| --- | --- | --- | --- | --- |
| NO | Soil depth (cm) | Soil seed banks species obtained from each layer | Frequency (%) | seeds/m2 |
| 1 | 0-3cm | *Achyranthes aspera* | 2(5.5%) | 177.8 |
| 2 |  | *Psilotrichum.elliotii* | 3(8.3%) | 222.2 |
| 3 |  | *Ageratum conyzoides* | 8(22.2%) | 1822.2 |
| 4 |  | *Acmella caulirhiza* | 5(13.8%) | 533.3 |
| 5 |  | *Adenostemma mauritianum* | 1(2.7%) | 44.4 |
| 6 |  | *Crotom macrostachyus* | 22(61.1%) | 1822.2 |
| 7 |  | *Galinsoga parviflora* | 4(11.1%) | 1644.4 |
| 8 |  | *Guizotia scabra* | 2(5.5%) | 1333.3 |
| 9 |  | *Laggera crispata* | 2(5.5%) | 311.1 |
| 10 |  | *Tagetes minuta* | 4(11.1%) | 622.2 |
| 11 |  | *Vernonia auriculifera* | 7(19.4%) | 88.9 |
| 12 |  | *Dichorocephala integrifila* | 2(5.5%) | 133.3 |
| 13 |  | *Cynoglossum lanceolatum* | 2(5.5%) | 177.8 |
| 14 |  | *Cardamine trichocarpa* | 13(36.1%) | 2400.0 |
| 15 |  | *Uebelinia abyssinica* | 2(5.5%) | 222.2 |
| 16 |  | *Commelina benghalensis* | 14(38.8%) | 133.3 |
| 17 |  | *Kalanchoe petitiana* | 3(8.3%) | 355.6 |
| 18 |  | *Centella asiatica* | 21(58.3%) | 6222.2 |
| 19 |  | *Cyperus escuulantus* | 3(8.3%) | 1600.0 |
| 20 |  | *Cyperus nivues* | 2(5.5%) | 444.4 |
| 21 |  | *Euphorbia rothiana* | 2(5.5%) | 311.1 |
| 22 |  | *Phyllanthus ovalifolius* | 3(8.3%) | 133.3 |
| 23 |  | *Entada abyssinica* | 2(5.5%) | 88.9 |
| 24 |  | *Pterolobium stellatum* | 3(8.3%) | 133.3 |
| 25 |  | *Trifolium baccarini* | 5(13.8%) | 1022.2 |
| 26 |  | *Trifolium rueppellianum* | 5(13.8%) | 800.0 |
| 27 |  | *Leucas martinicensis* | 3(8.3%) | 311.1 |
| 28 |  | *Ficus sur* | 2(5.5%) | 133.3 |
| 29 |  | *Plantago lanceoleta* | 2(5.5%) | 44.4 |
| 30 |  | *Digitaria abyssinica* | 5(13.8%) | 400.0 |
| 31 |  | *Digitaria ternata* | 2(5.5%) | 88.9 |
| 32 |  | *Eleusine indica* | 5(13.8%) | 1733.3 |
| 33 |  | *Eragrostis paniciformis* | 2(5.5%) | 355.6 |
| 34 |  | *Eragrostsis schwienfurthii* | 1(2.7%) | 222.2 |
| 35 |  | *Persicaria.nepalensis* | 2(5.5%) | 133.3 |
| 36 |  | *Mitracarpus hirtus* | 2(5.5%) | 266.7 |
| 37 |  | *Oldenlandia herbacea* | 1(2.7%) | 177.8 |
| 38 |  | *Cyperus brevifolius* | 6(16.6%) | 3155.6 |
| 39 |  | *Nicandra physaloides* | 2(5.5%) | 133.3 |
| 40 |  | *Triumfetta brachyceras* | 1(2.7%) | 133.3 |
| 41 |  | *Triumfeta rhomboidea* | 2(5.5%) | 222.2 |
| 42 |  | *Pilea tetraphylla* | 6(16.6%) | 222.2 |
| 43 |  | *Cyperus fischerianus* | 25(69.4%) | 3733.3 |
| 44 |  | *Oplismenus hirtellus* | 20(55.5%) | 5066.7 |
| 45 |  | *Veronica javanica* | 19(52.7%) | 8888.9 |
| 1 | 3-6 cm | *Centella asiatica* | 15(41.6%) | 4577.8 |
| 2 |  | *Acmella caulirhiza* | 4(11.1%) | 177.8 |
| 3 |  | *Anagalis arvensis* | 3(8.3%) | 444.4 |
| 4 |  | *Calpurnia aurea* | 2(5.5%) | 88.9 |
| 5 |  | *Cardamine trichocarpa* | 3(8.3%) | 1733.3 |
| 6 |  | *Cyperus fischerianus* | 9(25%) | 2666.7 |
| 7 |  | *Commelina benghalensis* | 2(5.5%) | 222.2 |
| 8 |  | *Crotom macrostachyus* | 2(5.5%) | 133.3 |
| 9 |  | *Cyperus brevifolius* | 2(5.5%) | 844.4 |
| 10 |  | *Stellaria mannii* | 2(5.5%) | 88.9 |
| 11 |  | *Dichorocephala integrifila* | 3(8.3%) | 177.8 |
| 12 |  | *Digitaria abyssinica* | 3(8.3%) | 355.6 |
| 13 |  | *Digitaria ternata* | 2(5.5%) | 444.4 |
| 14 |  | *Eleusine indica* | 1(2.7%) | 1644.4 |
| 15 |  | *Entada abyssinica* | 3(8.3%) | 88.9 |
| 16 |  | *Galinsoga parviflora* | 2(5.5%) | 1511.1 |
| 17 |  | *Guizotia scabra* | 4(11.1%) | 444.4 |
| 18 |  | *Hypoestes triflora* | 2(5.5%) | 177.8 |
| 19 |  | *Laggera crispata* | 1(2.7%) | 133.3 |
| 20 |  | *Nicandra physaloides* | 5(13.8%) | 266.7 |
| 21 |  | *Oldenlandia herbacea* | 7(19.4%) | 133.3 |
| 22 |  | *Oplismenus hirtellus* | 6(16.6%) | 755.6 |
| 23 |  | *Phyllanthus ovalifolius* | 2(5.5%) | 222.2 |
| 24 |  | *Pilea tetraphylla* | 5(13.8%) | 222.2 |
| 25 |  | *Plantago lanceoleta* | 6(16.6%) | 44.4 |
| 26 |  | *Pterolobium stellatum* | 2(5.5%) | 44.4 |
| 27 |  | *Trifolium baccarini* | 2(5.5%) | 222.2 |
| 28 |  | *Trifolium rueppellianum* | 2(5.5%) | 1955.6 |
| 29 |  | *Triumfetta brachyceras* | 2(5.5%) | 133.3 |
| 30 |  | *Mitracarpus hirtus* | 1(2.7%) | 266.7 |
| 31 |  | *Uebelinia abyssinica* | 2(5.5%) | 133.3 |
| 32 |  | *Ageratum conyzoides* | 5(13.8%) | 5911.1 |
| 33 |  | *Veronica javanica* | 2(5.5%) | 5333.3 |
| 1 | 6-9 cm | *Centella asiatica* | 14(38.8%) | 3955.6 |
| 2 |  | *Hygrophyla schulii* | 3(8.3%) | 133.3 |
| 3 |  | *Dichorocephala integrifila* | 1(2.7%) | 88.9 |
| 4 |  | *Acmella caulirhiza* | 3(8.3%) | 44.4 |
| 5 |  | *Entada abyssinica* | 3(8.3%) | 88.9 |
| 6 |  | *Vernonia auriculifera* | 2(5.5%) | 133.3 |
| 7 |  | *Ageratum conyzoides* | 11(30.5%) | 1733.3 |
| 8 |  | *Cardamine trichocarpa* | 1(2.7%) | 844.4 |
| 9 |  | *Stellaria mannii* | 1(2.7%) | 88.9 |
| 10 |  | *Commelina benghalensis* | 4(11.1%) | 44.4 |
| 11 |  | *Ipomea teteraphyla* | 2(5.5%) | 133.3 |
| 12 |  | *Kalanchoe petitiana* | 3(8.3%) | 133.3 |
| 13 |  | *Nicandra physaloides* | 1(2.7%) | 133.3 |
| 14 |  | *Cyperus fischerianus* | 19(52.7%) | 1866.7 |
| 15 |  | *Calpurnia aurea* | 2(5.5%) | 177.8 |
| 16 |  | *Crotom macrostachyus* | 3(8.3%) | 133.3 |
| 17 |  | *Phyllanthus ovalifolius* | 1(2.7%) | 355.6 |
| 18 |  | *Pterolobium stellatum* | 4(11.1%) | 266.7 |
| 19 |  | *Trifolium rueppellianum* | 4(11.1%) | 888.9 |
| 20 |  | *Leucas martinicensis* | 3(8.3%) | 133.3 |
| 21 |  | *Ficus sur* | 2(5.5%) | 133.3 |
| 22 |  | *Oldenlandia herbacea* | 3(8.3%) | 444.4 |
| 23 |  | *Eragrostis paniciformis* | 3(8.3%) | 311.1 |
| 24 |  | *Oplismenus hirtellus* | 13(36.1%) | 577.8 |
| 25 |  | *Laggera crispata* | 3(8.3%) | 222.2 |
| 26 |  | *Anagalis arvensis* | 3(8.3%) | 311.1 |
| 27 |  | *Veronica javanica* | 20(55.5%) | 4444.4 |
| 28 |  | *Cyperus brevifolius* | 2(5.5%) | 1333.3 |

Supplementary appendix 3: Mean (±SD) soil seed densities m−2 recovered from different land use types

| Explanatory variables | | Mean ± SD | Maximum | Minimum |
| --- | --- | --- | --- | --- |
| Land-use types | Forestland | 539.9±2.3 | 1956 | 89 |
| Shrub land | 1320.2±2.1 | 3600 | 356 |
| Bare land | 1089.6±1.5 | 2667 | 400 |
| Grassland | 1315.3±2.3 | 4044 | 444 |

Supplementary appendix 4: Similarity of the Jaccard coefficient in species composition between land cover types (bold number = high and low similarity index)

| JSC | Forestland | Shrubland | Bare land | Grassland |
| --- | --- | --- | --- | --- |
| Forestland | - | - | - | - |
| Shrubland | 0.72 | - | - | - |
| Bare land | 0.56 | 0.43 | - | - |
| Grassland | 0.62 | 0.47 | 0.49 | - |

Supplementary appendix 5: Jaccard’s coefficient of similarity (JCS) among soil layers (**: highest Jaccard’s coefficient of similarity, * least Jaccard’s coefficient of similarity)

| JSC | Layers of soil | | |
| --- | --- | --- | --- |
|  | 0-3 cm | 3-6 cm | 6-9 cm |
| 0-3 cm | - | 0.76** | 0.32* |
| 3-6 cm | - | - | 0.53 |
| 6-9 cm | - | - | - |

Supplementary appendix 6: Jaccard’s coefficient of similarity between the soil seed bank and aboveground vegetation

| Land use types | No. of species present only in the standing vegetation | No. of species present only in the SSB | Common species | JCS |
| --- | --- | --- | --- | --- |
| Shrub land | 90 | 31 | 25 | 0.23 |
| Forestland | 78 | 27 | 18 | 0.21 |
| Grassland | 66 | 22 | 9 | 0.13 |
